# Supplementary material
Source: publisher figshare collection journal article supplement (https://acs.figshare.com/ndownloader/files/24146129)
Supplement: Supplementary file 1 [file 24146129]

## Supporting Information

### **Rapid Prediction of Chemical Ecotoxicity Through Genetic Algorithm Optimized Neural Network Models**

Ping Hou<sup>1,2</sup>, Bu Zhao<sup>1,2</sup>, Olivier Jolliet<sup>3</sup>, Ji Zhu<sup>4</sup>, Peng Wang<sup>5</sup>, and Ming Xu<sup>1,7\*</sup>

<sup>1</sup> School for Environment and Sustainability, University of Michigan, 440 Church St., Ann Arbor, MI, 48109, USA.

<sup>2</sup> Michigan Institute for Computational Discovery & Engineering, University of Michigan, 500 Church St., Ann Arbor, MI, 48109, USA.

<sup>3</sup> Environmental Health Sciences, School of Public Health, University of Michigan, 1415 Washington Heights, Ann Arbor, MI, 48109, USA.

<sup>4</sup> Department of Statistics, University of Michigan, 1085 South University, Ann Arbor, MI, 48109, USA.

<sup>5</sup> Department of Electrical and Computer Engineering, University of Kentucky, 512 Administration Drive, Lexington, KY, 40506, USA.

<sup>6</sup> Department of Mechanical Engineering, University of Kentucky, 151 Ralph G. Anderson Building, Lexington, KY, 40506, USA.

<sup>7</sup> Department of Civil and Environmental Engineering, University of Michigan, 2350 Hayward Street, Ann Arbor, MI, 48109, USA.

\*Correspondence to: [mingxu@umich.edu](mailto:mingxu@umich.edu).

This Supporting Information includes 3 pages, 2 figures and 1 table.

**Table S1.** Commonly used activation functions.

| Name                          | Input output relation                                                                                                                               | Graphic representation                                                                |
|-------------------------------|-----------------------------------------------------------------------------------------------------------------------------------------------------|---------------------------------------------------------------------------------------|
| ReLU (Rectified Linear Unit)  | $f(x) = \alpha * (x - threshold) \quad x < threshold$ $f(x) = x \quad threshold \leq x \leq max\_value$ $f(x) = max\_value \quad x \geq max\_value$ |    |
| ELU (Exponential linear unit) | $f(x) = \alpha * (\exp(x) - 1) \quad x < 0$ $f(x) = x \quad x \geq 0$                                                                               |    |
| TanH (Hyperbolic tangent)     | $f(x) = \frac{e^x - e^{-x}}{e^x + e^{-x}}$                                                                                                          |    |
| Sigmoid                       | $f(x) = \frac{1}{1 + e^{-x}}$                                                                                                                       |    |
| Hard_sigmoid                  | $f(x) = 0 \quad x < -2.5$ $f(x) = 0.2 * x + 0.5 \quad -2.5 \leq x \leq 2.5$ $f(x) = 1 \quad x \geq 2.5$                                             |   |
| SoftPlus                      | $f(x) = \log(\exp(x) + 1)$                                                                                                                          |  |
| Linear                        | $f(x) = x$                                                                                                                                          |  |

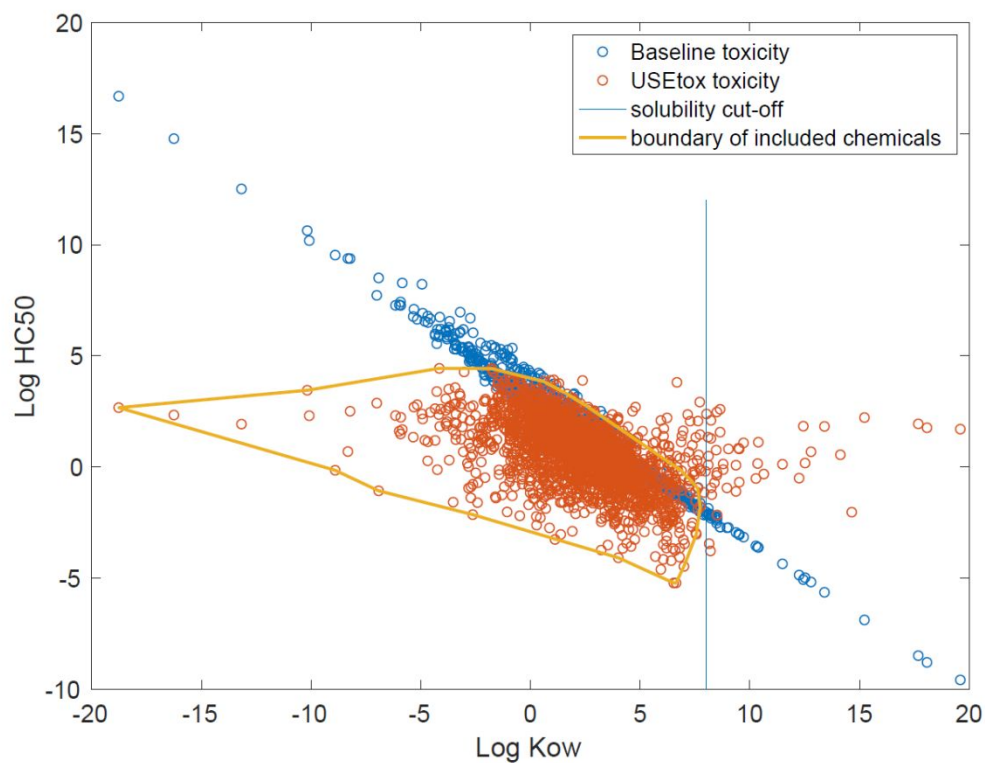

**Figure S1.** Data filtering result

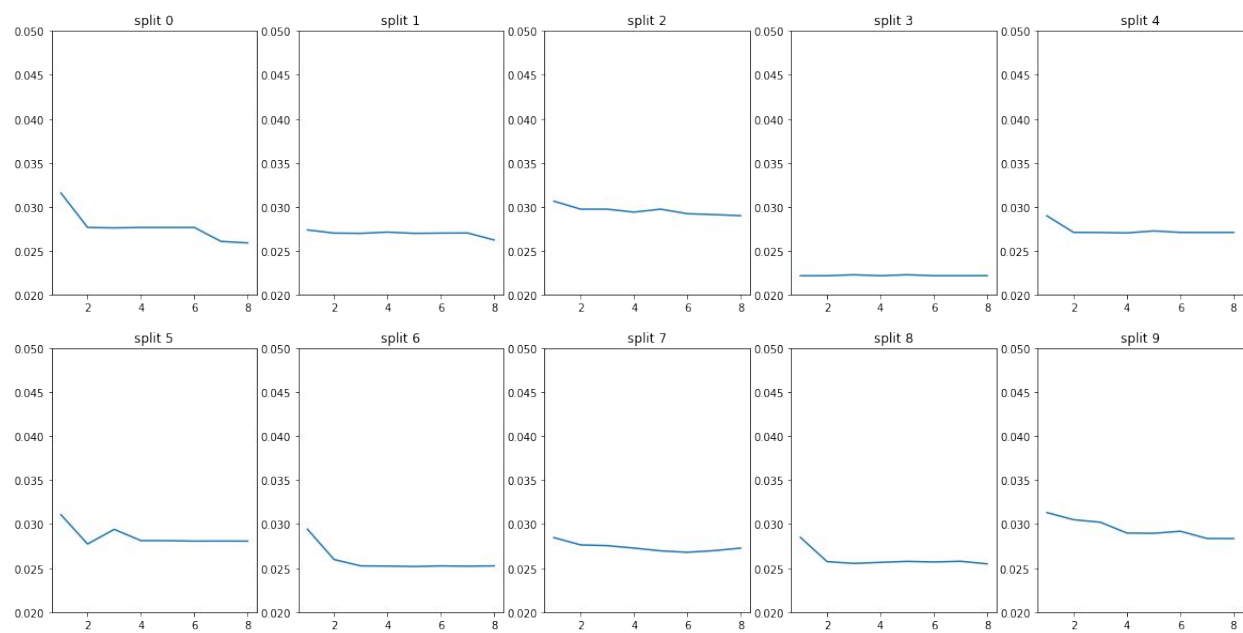

**Figure S2.** Fitness (i.e., validation MSE) of the best model along eight generations.
